# Supplementary material for: Air Pollution Affecting Pollen Concentrations through Radiative Feedback in the Atmosphere
Source: MDPI journal article supplement (doi:10.3390/atmos12111376), 2021-10-21
Supplement: s1 [file s1]

## Article

# Air pollution affecting pollen concentrations through radiative feedback in the atmosphere – supplementary material

Carsten A. Skjøth<sup>1\*</sup>, Alexander Kurganskiy<sup>1,2</sup>, Maria Grundström<sup>1,3</sup>, Małgorzata Werner<sup>4</sup> and Beverley Adams-Groom<sup>1</sup>

<sup>1</sup> University of Worcester, School of Science and the Environment, Henwick Grove, Worcester, WR2 6AJ, United Kingdom

<sup>2</sup> University of Exeter, Penryn Campus, Treliever Road, Penryn, Cornwall, TR10 9FE, United Kingdom; A.Kurganskiy@exeter.ac.uk

<sup>3</sup> Swedish Meteorological and Hydrological Institute, Folkborgsvägen 17, 60176 Norrköping, Sweden; dr.m.grundstrom@gmail.com

<sup>4</sup> University of Wrocław, Department of Climatology and Atmosphere Protection, ul. Kosiby 8, 51-621 Wrocław, Poland; malgorzata.werner@uw.edu.pl

<sup>1</sup> Worcester, School of Science and the Environment, Henwick Grove, Worcester, WR2 6AJ, United Kingdom; BAG; b.adams-groom@worc.ac.uk

\* Correspondence: c.skjoth@worc.ac.uk; Tel.: +44 (0)1905 85 5226

**Table S1.** Observed pollen concentrations in 2014 at Isle of Wight (IoW), Worcester (Wor), Plymouth (Ply), Cambridge (Cam) and Ipswich (Ips) for *Corylus* (hazel) and *Alnus* (alder). Unusual pollen counts are highlighted.

| Date | <i>Corylus sp</i> |     |     |     |     | <i>Alnus sp</i> |     |     |     |     |
|------|-------------------|-----|-----|-----|-----|-----------------|-----|-----|-----|-----|
| 25/3 | IoW               | Wor | Ply | Cam | Ips | IoW             | Wor | Ply | Cam | Ips |
| 26/3 | 2                 | 0   | 1   | 0   | 0   | 0               | 1   | 3   | 0   | 0   |
| 27/3 | 2                 | 1   | 0   | 0   | 0   | 0               | 1   | 1   | 1   | 0   |
| 28/3 | 1                 | 1   | 0   | 0   | 0   | 0               | 1   | 1   | 0   | 0   |
| 29/3 | 2                 | 0   | 0   | 0   | 0   | 1               | 1   | 0   | 2   | 0   |
| 30/3 | 6                 | 1   | 9   | 0   | 0   | 4               | 1   | 6   | 0   | 0   |
| 31/3 | 3                 | 2   | 2   | 1   | 0   | 1               | 0   | 2   | 0   | 1   |
| 1/4  | 1                 | 0   | 1   | 2   | 0   | 0               | 0   | 0   | 0   | 0   |
| 2/4  | 1                 | 0   | 1   | 0   | 0   | 2               | 1   | 1   | 0   | 0   |
| 3/4  | 1                 | 0   | 1   | 1   | 0   | 0               | 0   | 0   | 0   | 0   |
| 4/4  | 3                 | 0   | 1   | 0   | 0   | 0               | 0   | 1   | 0   | 0   |
| 5/4  | 0                 | 0   | 1   | 0   | 0   | 0               | 1   | 0   | 0   | 0   |

**Table S2.** Observed pollen concentrations in 2014 at Isle of Wight (IoW), Worcester (Wor), Plymouth (Ply), Cambridge (Cam) and Ipswich (Ips) for *Salix* (willow) and *Fraxinus* (ash).

| Date | <i>Salix sp</i> |     |     |     |     | <i>Fraxinus sp.</i> |     |     |     |     |
|------|-----------------|-----|-----|-----|-----|---------------------|-----|-----|-----|-----|
| 25/3 | IoW             | Wor | Ply | Cam | Ips | IoW                 | Wor | Ply | Cam | Ips |
| 26/3 | 3               | 2   | 1   | 5   | 1   | 0                   | 0   | 1   | 0   | 1   |
| 27/3 | 3               | 14  | 1   | 0   | 1   | 0                   | 1   | 1   | 0   | 0   |
| 28/3 | 3               | 2   | 1   | 2   | 4   | 1                   | 0   | 1   | 0   | 8   |
| 29/3 | 8               | 17  | 0   | 10  | 9   | 2                   | 2   | 0   | 8   | 10  |
| 30/3 | 16              | 63  | 14  | 17  | 1   | 16                  | 13  | 10  | 13  | 6   |
| 31/3 | 15              | 26  | 20  | 17  | 11  | 4                   | 17  | 11  | 15  | 1   |
| 1/4  | 5               | 18  | 3   | 7   | 15  | 2                   | 3   | 1   | 1   | 25  |
| 2/4  | 12              | 15  | 21  | 7   | 11  | 7                   | 4   | 7   | 2   | 8   |
| 3/4  | 19              | 49  | 19  | 21  | 1   | 9                   | 12  | 7   | 12  | 11  |
| 4/4  | 5               | 8   | 1   | 10  | 6   | 16                  | 2   | 0   | 17  | 7   |
| 5/4  | 24              | 12  | 1   | 11  | 1   | 2                   | 5   | 2   | 11  | 1   |
